# Supplementary material for: The Transcriptome Landscape of the In Vitro Human Airway Epithelium Response to SARS-CoV-2
Source: MDPI journal article supplement (doi:10.3390/ijms241512017), 2023-07-27
Supplement: s1 [file s1]

Table S1 :

| Genes                               | Primer forward             | Primer reverse           | Paper reference (PMID) |
|-------------------------------------|----------------------------|--------------------------|------------------------|
| <b>IFI35</b>                        | GAGGGTGTTGGTCACTGGATT      | CA CCTCCGTTCTAGTCTTGC    | PMID: <b>28064541</b>  |
| <b>IFI44</b>                        | TCCAAGGGCATGTAACGCAT       | CCTCCCTTAGATTCCCTATTTGCT | PMID: <b>34760904</b>  |
| <b>IFIT1</b>                        | GCCTTGCTGAAGTGTGGAGGAA     | ATCCAGGCGATAGGCAGAGATC   | PMID : <b>33142113</b> |
| <b>IFIT3</b>                        | GAAACAGCCATCATGAGTGAGG     | GCATCTGAGAGTCTGCCCAA     | PMID: <b>34760904</b>  |
| <b>ITGB1</b>                        | TGATTGGCTGGAGGAATGTTA      | GTTTCTGGACAAGGTGAGCAA    | PMID: <b>33345684</b>  |
| <b>MX1</b>                          | GGCTGTTTACCAGACTCCGACA     | CACAAAGCCTGGCAGCTCTCTA   | PMID: <b>33142113</b>  |
| <b>OAS3</b>                         | GAAGGAGTTCGTAGAGAAGGCG     | CCCTTGACAGTTTTTCAGCACC   | PMID: <b>32321151</b>  |
| <b>ISG15</b>                        | GCAGATCACCCAGAAGATCG       | GGCCCTTGTTATTCCTCACC     | PMID: <b>35637255</b>  |
| <b>SARS-CoV-2 envelope (gene E)</b> | ACAGGTACGTTAATAGTTAATAGCGT | ATATTGCAGCAGTACGCACACA   | PMID: <b>31992387</b>  |
| <b>GAPDH</b>                        | CCACCTTTGACGCTGGG          | CATACCAGGAAATGAGCTTGACA  | PMID : <b>15331414</b> |
| <b>GJA1</b>                         | GGCCTTCTTGCTGATCCAGT       | GCTGGTCCACAATGGCTAGT     | De novo primer         |
| <b>IRF9</b>                         | TATCAGTTGCTGCCACCAGG       | TAGGATGCCCTCTCAAGCT      |                        |
| <b>OAS1</b>                         | CCTACCCTGTGTGTGTGTCC       | GCATAGACCGTCAGGAGCTC     |                        |
| <b>CXCL10</b>                       | CCTCCAGTCTCAGCACCATG       | TGAAGCAGGGTCAGAACATCC    |                        |
